# Supplementary material
Source: bioRxiv or medRxiv preprint supplement (https://www.biorxiv.org/highwire/filestream/119295/field_highwire_adjunct_files/0/269779-1.pdf)
Supplement: Supplementary file [file 269779-1.pdf]

Figure S1

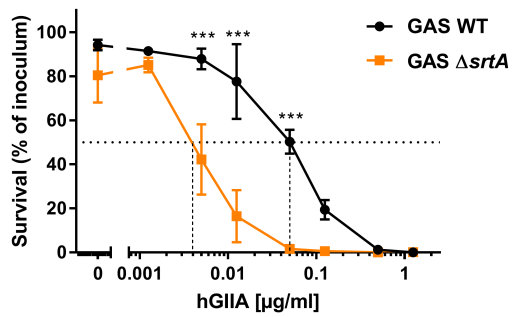

Figure S2

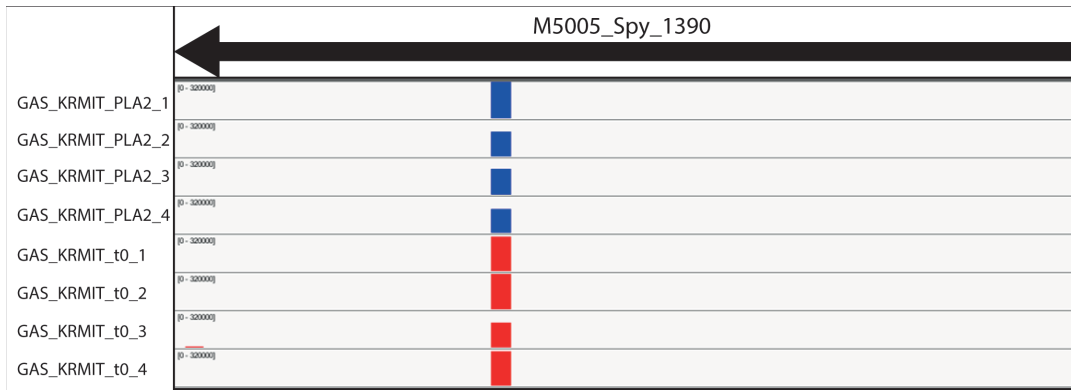

Figure S3

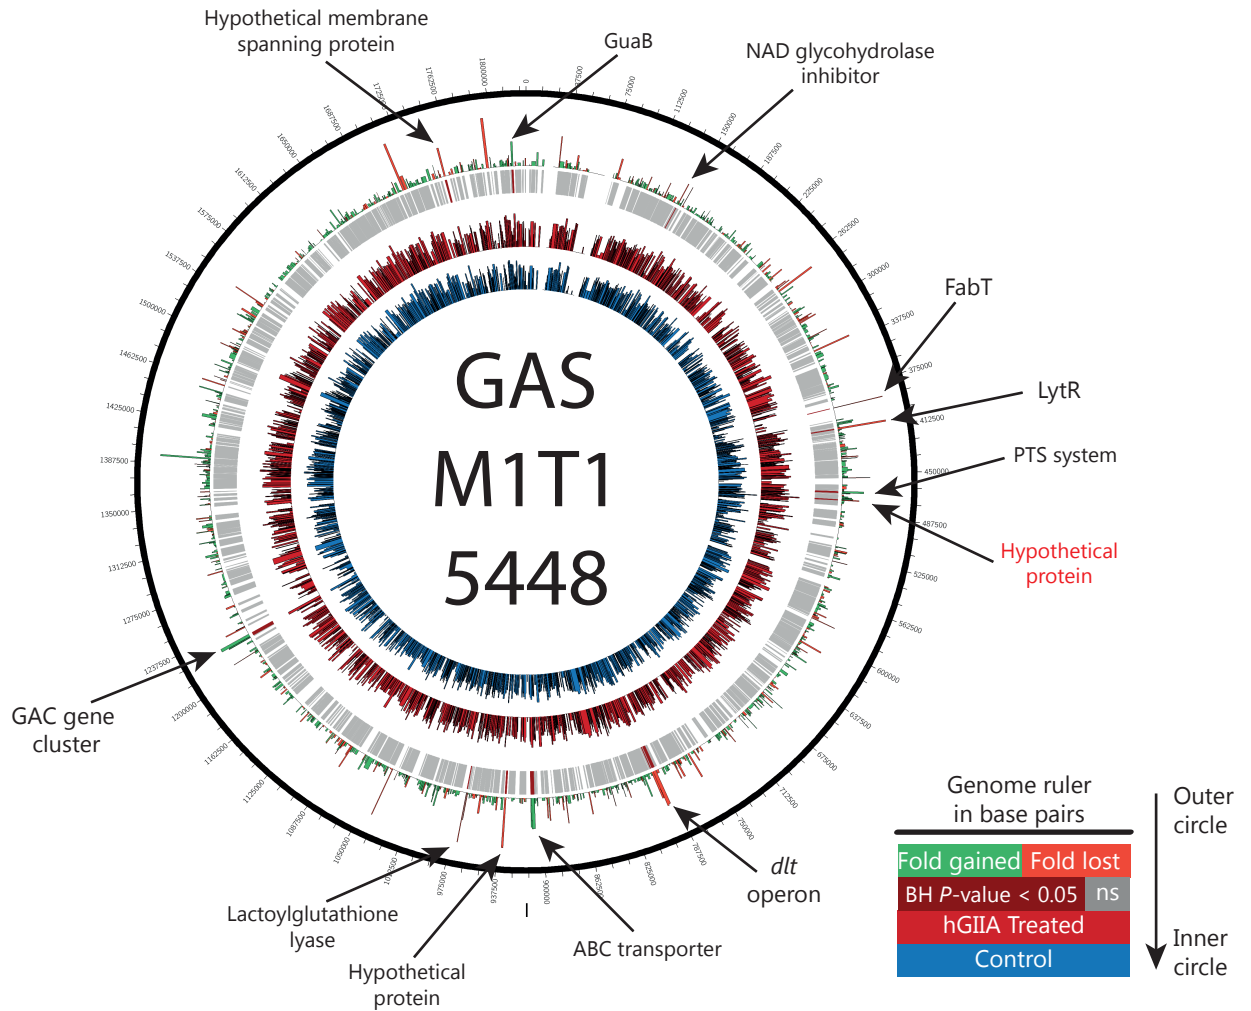

Figure S4

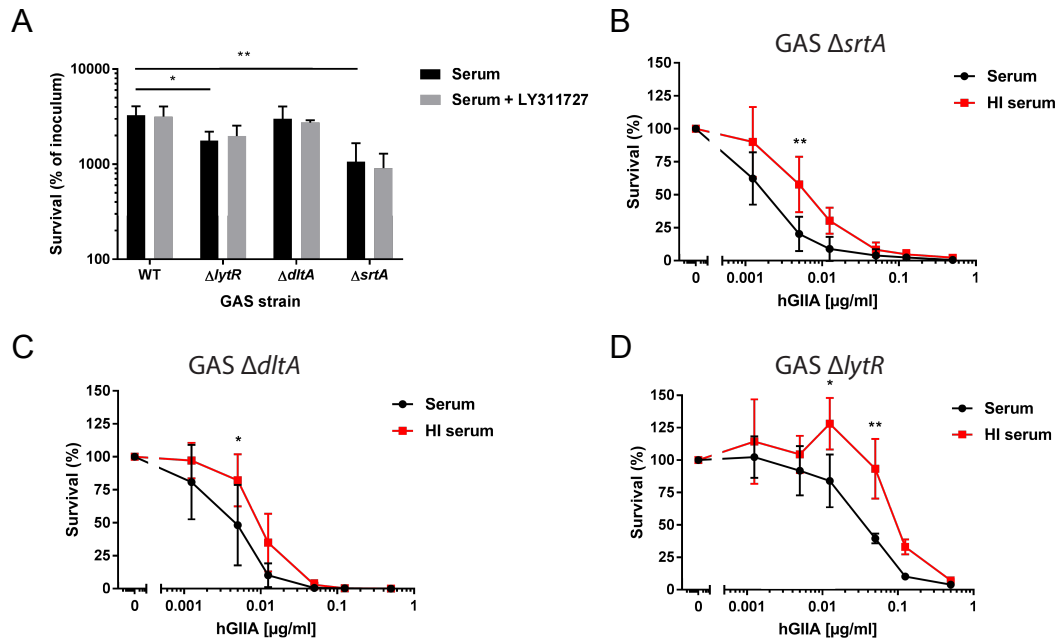

Figure S5

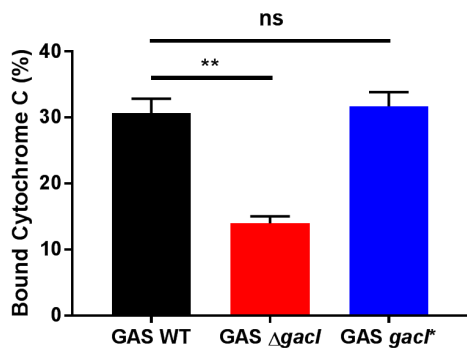

Figure S6

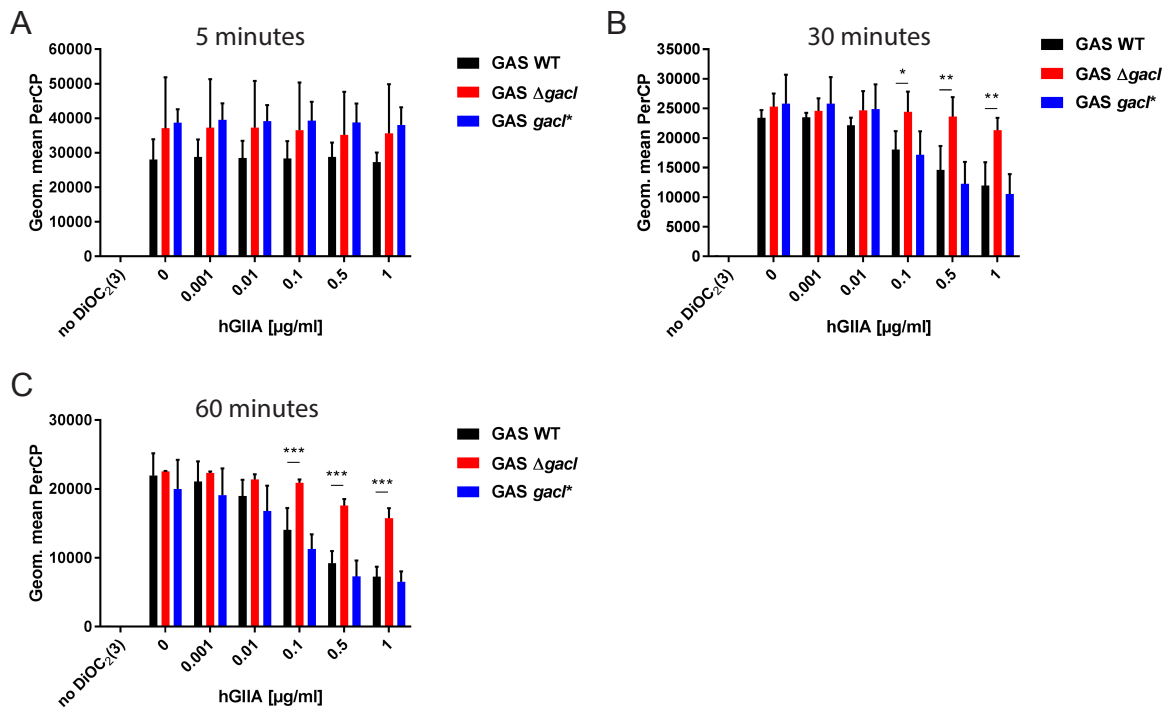

Figure S7

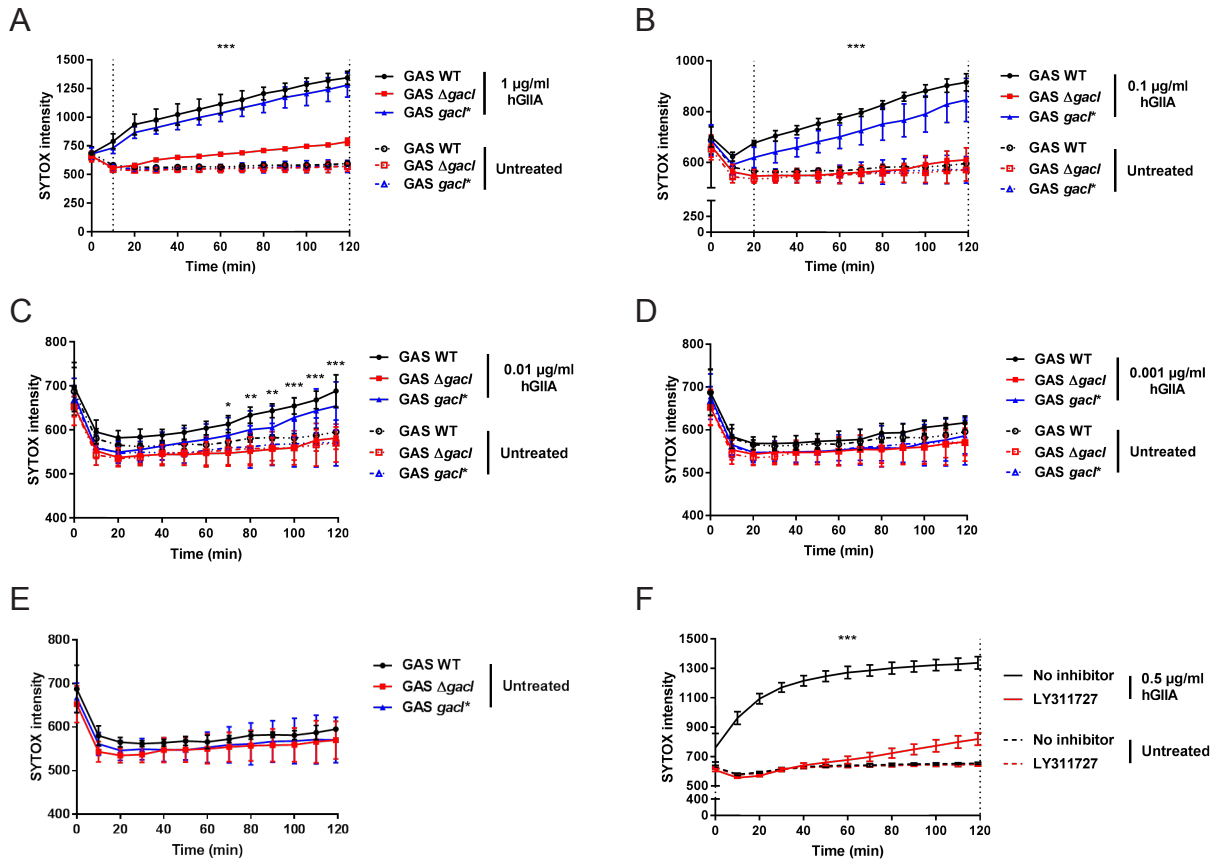

Figure S8

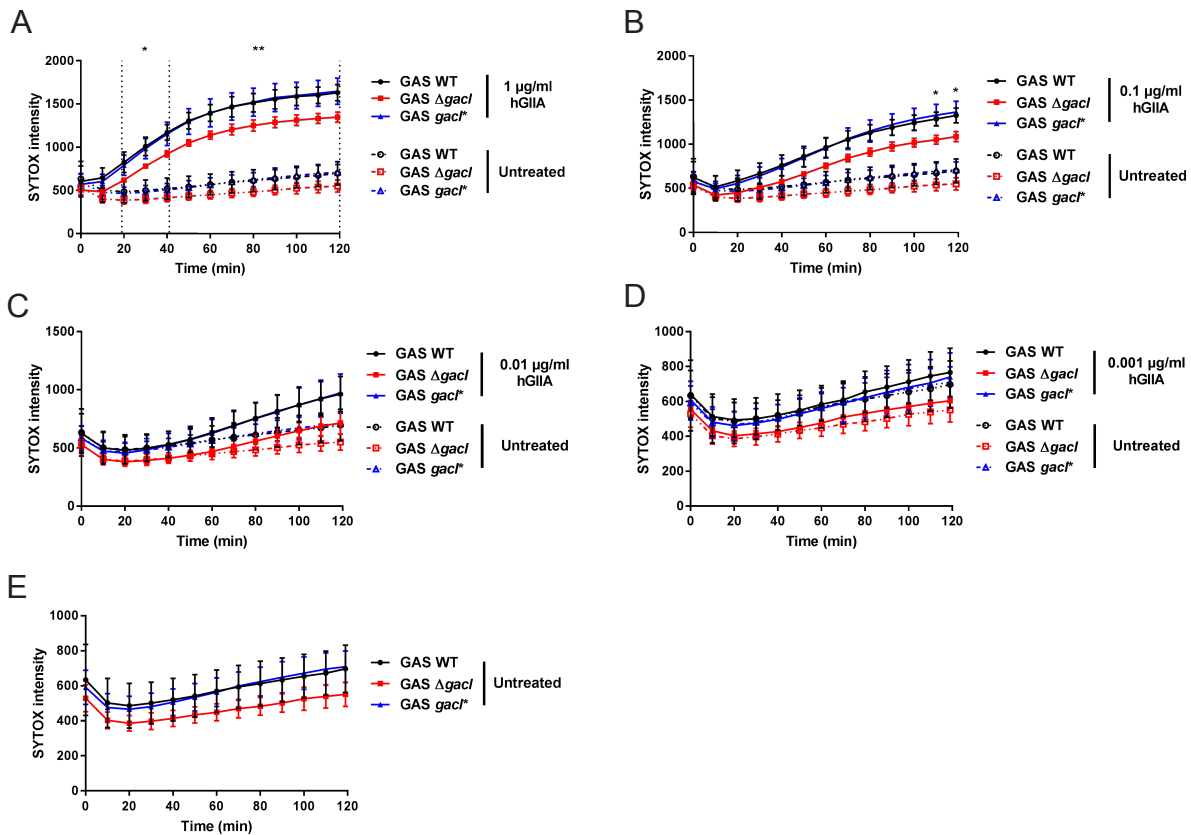



Figure S9

A

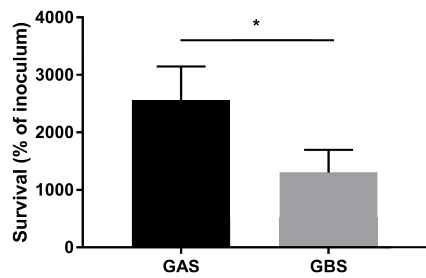

B

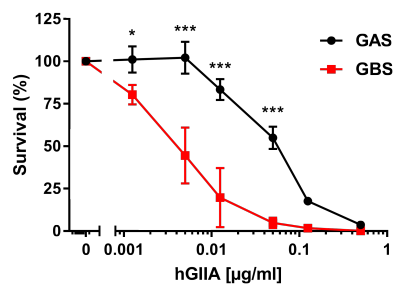

Figure S10

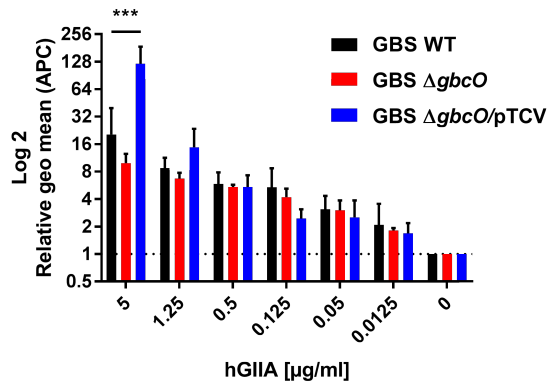

**Fig S1. GAS M1T1 5448 is killed by hGIIA in a dose-dependent manner.** Mutation of *srtA* renders 5448 more susceptible to hGIIA killing. Data represent mean +/- SD of three independent experiments. \*\*\*,  $p > 0.001$ .

**Fig S2. Biased transposon insertions in M5005\_Spy\_1390.** Unusual high number of transposon insertions at one location in the gene M5005\_Spy\_1390.

**Fig S3. Tn-seq results.** Circos representation of the Tn-seq data. Each bar in the inner two circles, where blue is control and red the hGIIA treated, represent the average RKPM value of a gene. The following to circles represent the BH corrected  $p$ -value and the fold change in log of the hGIIA treated samples vs control samples. Red bars indicate a fold a respective fold decrease and green bars a respective fold increase of transposon insertions. The gene highlighted in red is M5005\_Spy\_1390, which showed significant fold change due to unusual high transposon insertions at one specific point in the gene.

**Fig S4. Serum contains a heat-labile factor that increases hGIIA efficacy.** (A) Endogenous hGIIA in serum does not affect growth of GAS. Mutation of *lytR* and *srtA* does attenuate GAS growth independent of hGIIA. This heat-labile factor also affects killing of the (B) *srtA*, (C) *dltA*, and (D) *lytR* mutants. Data represent mean +/- SD of three independent experiments, \*,  $p > 0.05$ ; \*\*,  $p > 0.01$ ..

**Fig S5. Surface charge of GAS WT and GAS  $\Delta gacI$ .** Deletion of *gacI* affects surface charge of GAS as determined in cationic cytochrome c binding assay. Data represent mean +/- SD of three independent experiments. ns = not significant, \*\*,  $p > 0.01$ .

**Fig S6. Three additional time points for DiOC<sub>2</sub>(3) measurements.** The effect of hGIIA stress on GAS membrane potential after (A) 5 minutes, (B) 30 minutes and (C) 60 minutes. Data represent mean +/- SD of three independent experiments. \*,  $p > 0.05$ ; \*\*,  $p > 0.01$ ; \*\*\*,  $p > 0.001$ .

**Fig S7. Kinetics of the SYTOX influx in intact GAS strains.** SYTOX influx measured over

120 minutes when GAS strains are incubated with , (A) 1, (B) 0.1, (C) 0.01, (D) 0.001, and (E) 0  $\mu\text{g/ml}$  hGIIA. (F) Addition of 500  $\mu\text{M}$  LY311727 to 0.5  $\mu\text{g/ml}$  hGIIA prevents SYTOX influx. Data represent mean  $\pm$  SD of three independent experiments. \*,  $p > 0.05$ ; \*\*,  $p > 0.01$ ; \*\*\*,  $p > 0.001$ .

**Fig S8. Kinetics of the SYTOX influx in protoplast GAS strains.** SYTOX influx measured over 120 minutes when protoplast GAS strains are incubated with (A) 1, (B) 0.1, (C) 0.01, (D) 0.001, and (E) 0  $\mu\text{g/ml}$  hGIIA. Data represents mean  $\pm$  SD of three independent experiments. \*,  $p > 0.05$ ; \*\*,  $p > 0.01$ .

**Fig S9. Gas and GBS are differently affected by human serum.** (A) GAS grows faster in human serum compared to GBS. (B) GBS is more susceptible to hGIIA-spiked in serum compared to GAS. Data represent mean  $\pm$  SD of three independent experiments. \*,  $p > 0.05$ ; \*\*\*,  $p > 0.001$ .

**Fig S10. HGIIA surface binding to GBS.** No significant difference in relative hGIIA surface binding of GBS WT and GBS  $\Delta\text{gbcO}$ . Data represent mean  $\pm$  SD of three independent experiments. \*\*\*,  $p > 0.001$ .
